# Supplementary material for: Protein Kinase Signaling Networks Driven by Oncogenic Gq/11 in Uveal Melanoma Identified by Phosphoproteomic and Bioinformatic Analyses
Source: PubMed Central journal article supplement (PMC10616553; doi:10.1016/j.mcpro.2023.100649), 2023-09-19
Supplement: mmc1.pdf [file mmc1.pdf]

## MP41

| Protein | Uniprot_ID | Site | log <sub>2</sub> FC | adj. pvalue | Kinase  |
|---------|------------|------|---------------------|-------------|---------|
| PPP6R3  | Q5H9R7-2   | S645 | 2.2                 | 2.8E-07     | unknown |
| AFF3    | P51826     | S881 | 2.5                 | 5.1E-11     | unknown |
| ADD1    | P35611-3   | S617 | 2.6                 | 4.0E-09     | unknown |
| SCRIB   | Q14160     | S37  | 2.6                 | 8.3E-08     | unknown |
| RASAL2  | Q9UJF2-2   | S877 | 2.6                 | 3.4E-08     | unknown |
| RHBDF2  | Q6PJF5-2   | S137 | 2.7                 | 9.3E-09     | unknown |
| MBP     | P02686     | T232 | 2.8                 | 3.6E-11     | ERK2    |
| TMPO    | P42166     | T154 | 2.8                 | 5.8E-09     | unknown |
| RHBDF2  | Q6PJF5-2   | S142 | 3.2                 | 4.5E-07     | unknown |
| KCNJ13  | O60928     | T327 | 3.2                 | 9.1E-08     | unknown |
| VEPH1   | Q14D04-2   | S430 | 3.5                 | 5.3E-11     | unknown |

**Table S1: Top sites showing increased phosphorylation in MP41 cells in response to FR.**

## MP46

| Protein | Uniprot_ID | Site  | log <sub>2</sub> FC | adj. pvalue | Kinase  |
|---------|------------|-------|---------------------|-------------|---------|
| LYN     | P07948     | S11   | 2.0                 | 5.5E-13     | unknown |
| ATP7A   | Q04656-5   | S362  | 1.9                 | 4.2E-12     | unknown |
| ADD1    | P35611-3   | S617  | 2.0                 | 7.4E-09     | unknown |
| KMT2C   | Q8NEZ4-3   | S759  | 2.3                 | 1.1E-02     | unknown |
| AHNAK   | Q09666     | T5824 | 2.4                 | 2.4E-07     | unknown |
| RHBDF2  | Q6PJF5-2   | S137  | 2.4                 | 1.1E-10     | unknown |
| PRPF6   | O94906     | T266  | 2.5                 | 2.0E-10     | unknown |
| NIPBL   | Q6KC79     | S709  | 2.5                 | 7.7E-09     | unknown |
| CUL3    | Q13618     | S737  | 2.5                 | 3.1E-10     | unknown |
| SYNM    | O15061     | S592  | 2.6                 | 6.1E-07     | unknown |
| LRCH1   | Q9Y2L9-2   | T568  | 2.7                 | 4.4E-08     | unknown |
| ATP2B4  | P23634-6   | S1126 | 2.9                 | 8.7E-07     | unknown |
| TOP2A   | P11388     | S1471 | 2.9                 | 1.5E-08     | unknown |
| KCNJ13  | O60928     | T327  | 3.1                 | 1.8E-12     | unknown |
| AGBL2   | Q5U5Z8     | Y332  | 3.1                 | 1.2E-11     | unknown |
| NAV3    | Q8IVL0-3   | S1186 | 3.2                 | 1.9E-11     | unknown |
| ATP2B4  | P23634-6   | S328  | 3.6                 | 3.6E-07     | unknown |

**Table S2: Top sites showing increased phosphorylation in MP46 cells in response to FR.**

# Pair-wise Correlations (proteins)

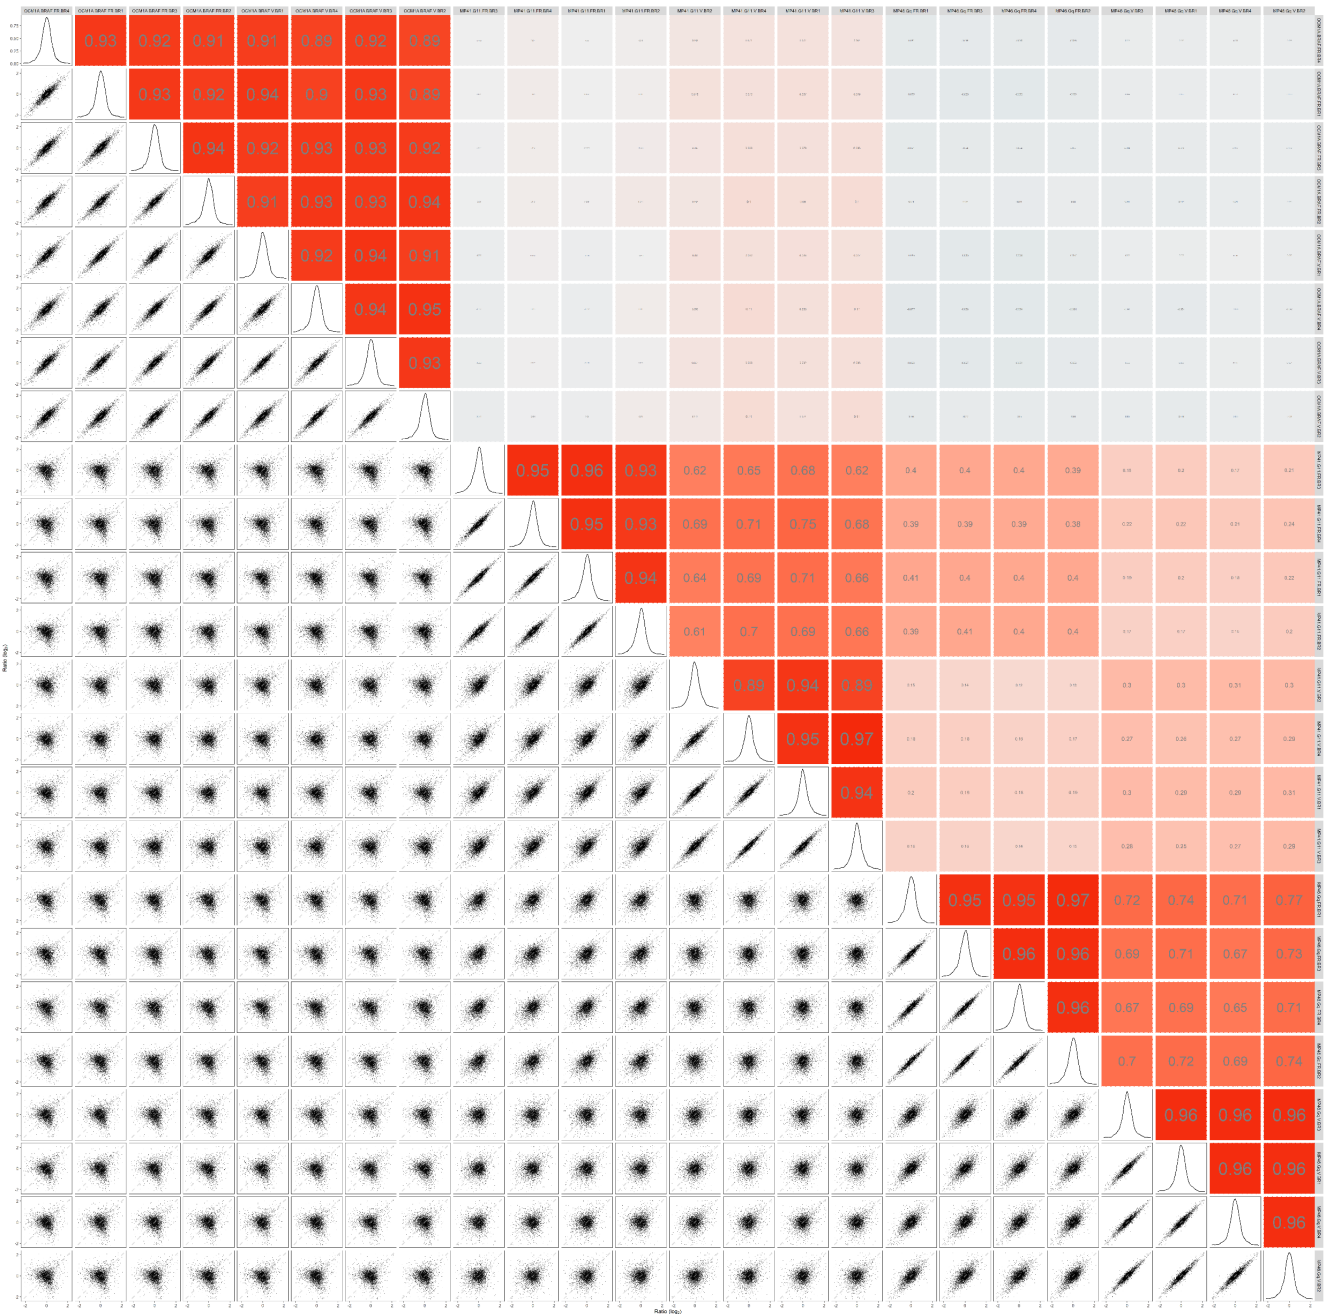

**Figure S1: Sample comparisons show FR responses in Gq/11-driven UM cells.** The machine data from the LC-MS analysis of isobarically-labeled peptides were converted to peak lists, and the raw MS data files were searched with MaxQuant. Protein log<sub>2</sub>-ratios were aligned across samples so that the maximum likelihood of log-ratios was centered at zero for each sample and then normalized across all samples and compared pair-wise.

# Pair-wise Correlations (phosphopeptides)

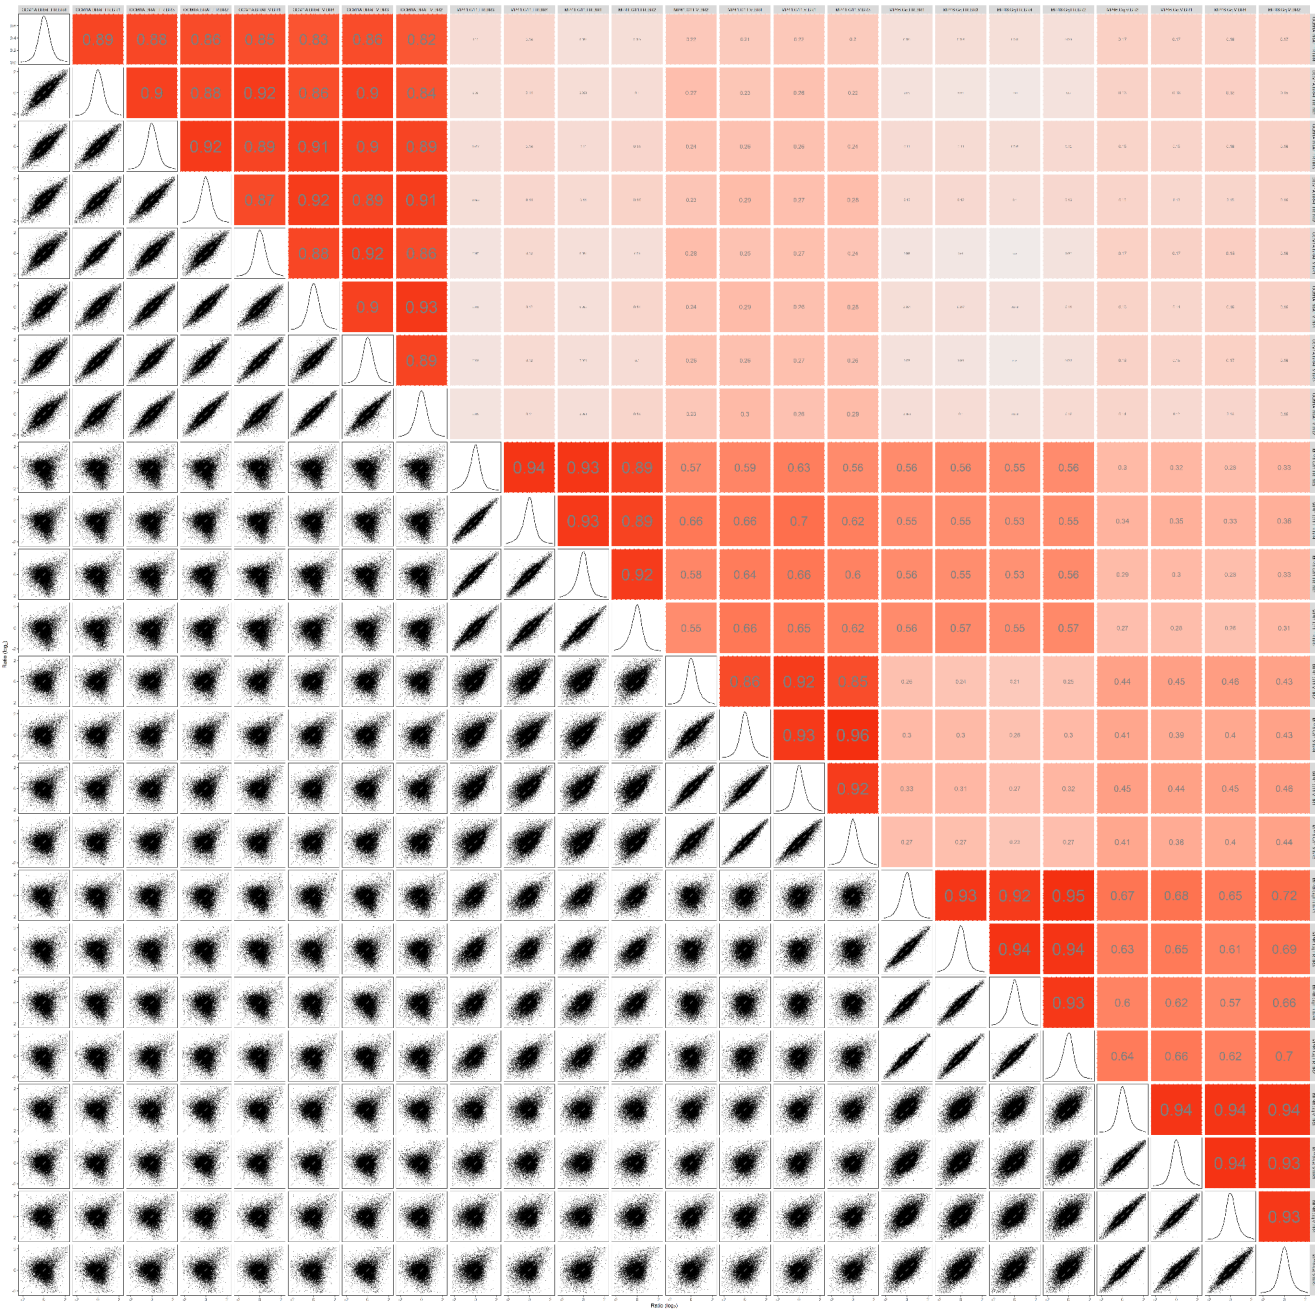

**Figure S2: Sample comparisons show FR responses in Gq/11-driven UM cells.** The machine data from the LC-MS analysis of isobarically-labeled peptides were converted to peak lists, and the raw MS data files were searched with MaxQuant. Phosphopeptide log<sub>2</sub>-ratios were aligned across samples so that the maximum likelihood of log-ratios was centered at zero for each sample and then normalized across all samples and compared pair-wise.

# MP41 CausalPath network FDR < 0.001

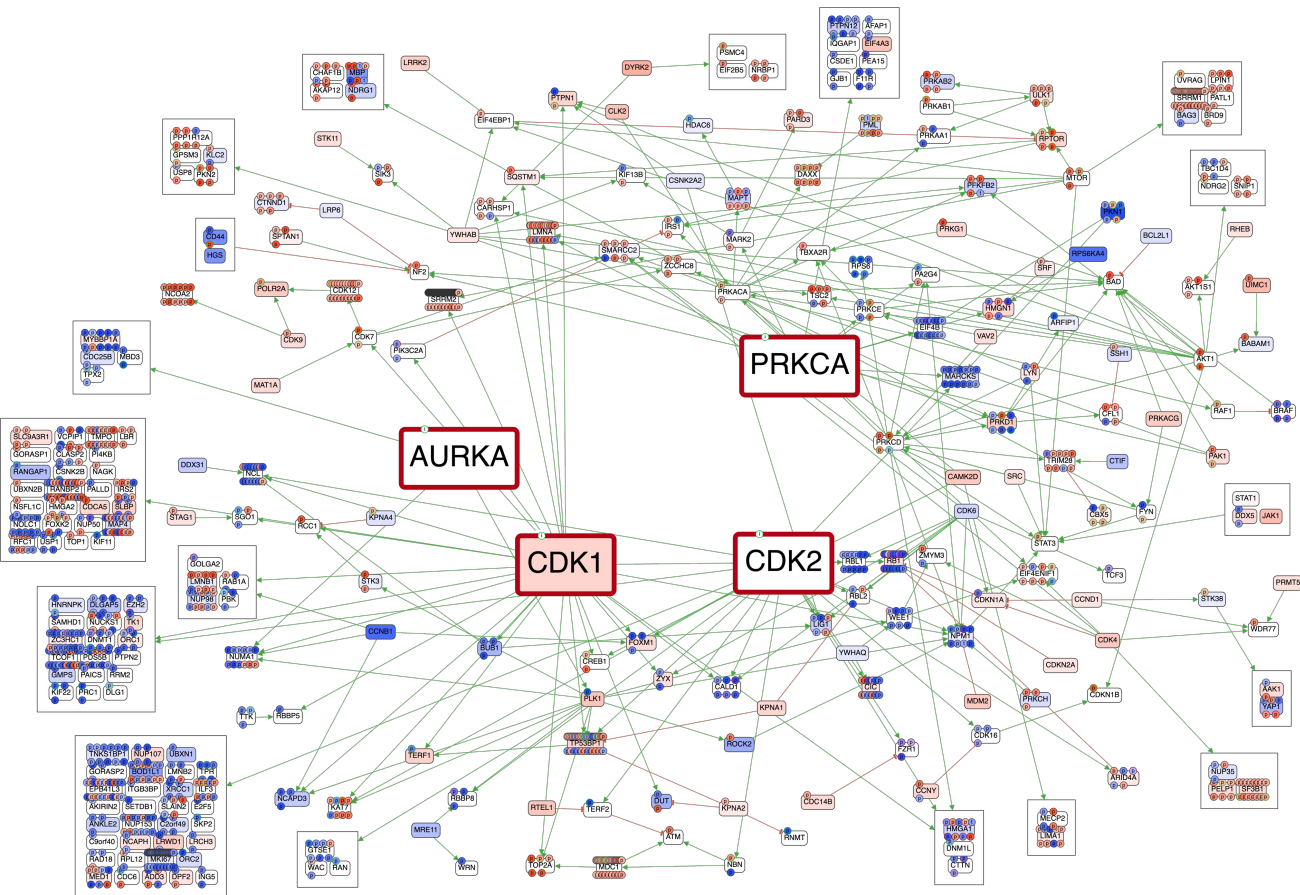

**Figure S3: CausalPath analysis of MP41 cells in response to FR.** CausalPath causative network for responses to FR in the MP41 cell line at FDR  $\leq 0.001$ . Phosphorylation sites are red if increased with FR and blue if decreased. Color intensities for phosphorylation are based on adjusted p-values, as determined by CausalPath. Protein levels are color coded based on log<sub>2</sub> fold change with FR (red: increased; blue: decreased). Black boxes indicate co-regulated targets of phosphorylation. Inactivated kinases are highlight with large boxes.



# MP46 CausalPath network FDR < 0.001

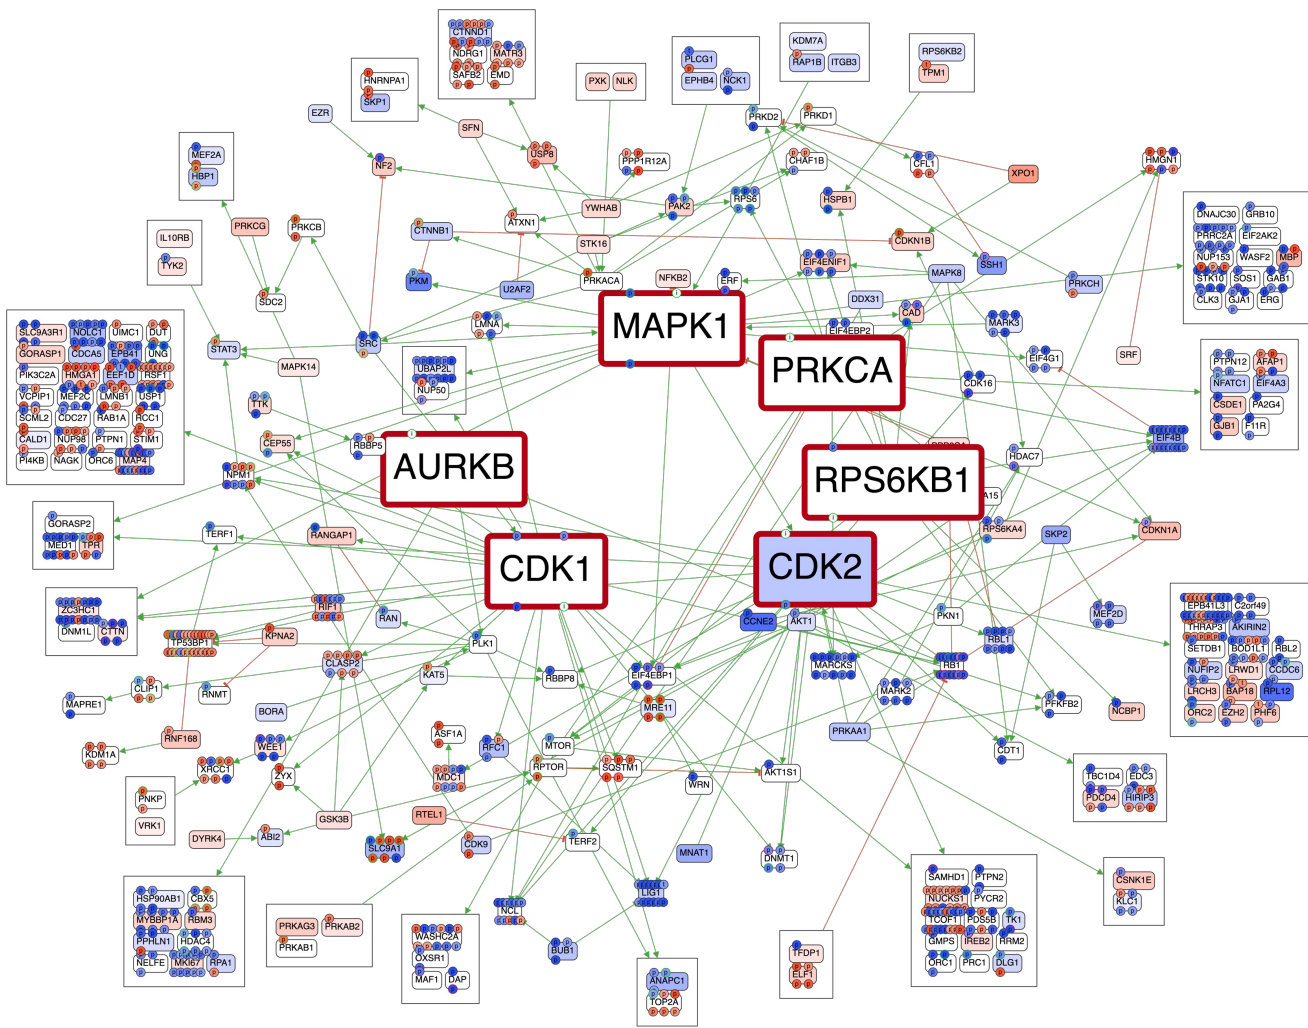

**Figure S4: CausalPath analysis of MP46 cells in response to FR.** CausalPath causative network for responses to FR in the MP46 cell line at FDR  $\leq 0.001$ . Phosphorylation sites are red if increased with FR and blue if decreased. Color intensities for phosphorylation are based on adjusted p-values, as determined by CausalPath. Protein levels are color coded based on log<sub>2</sub> fold change with FR (red: increased; blue: decreased). Black boxes indicate co-regulated targets of phosphorylation. Inactivated kinases are highlight with large boxes.

## Signaling proteins

MP41

MP46

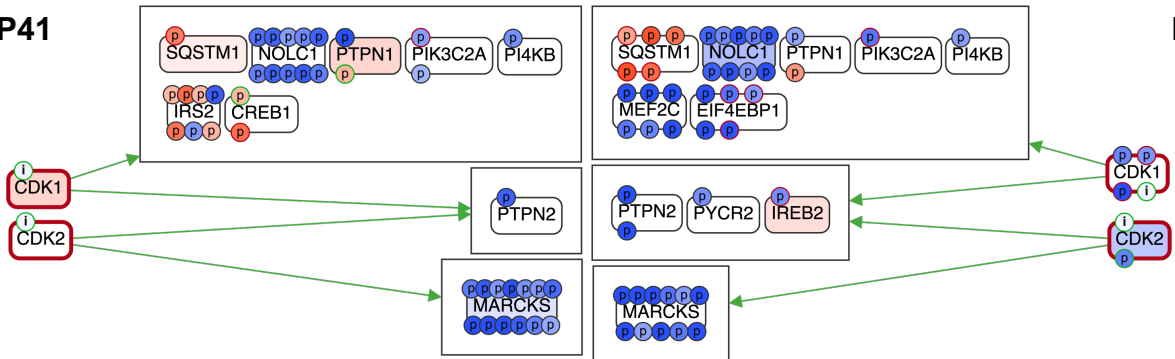

## Cytoskeleton regulators

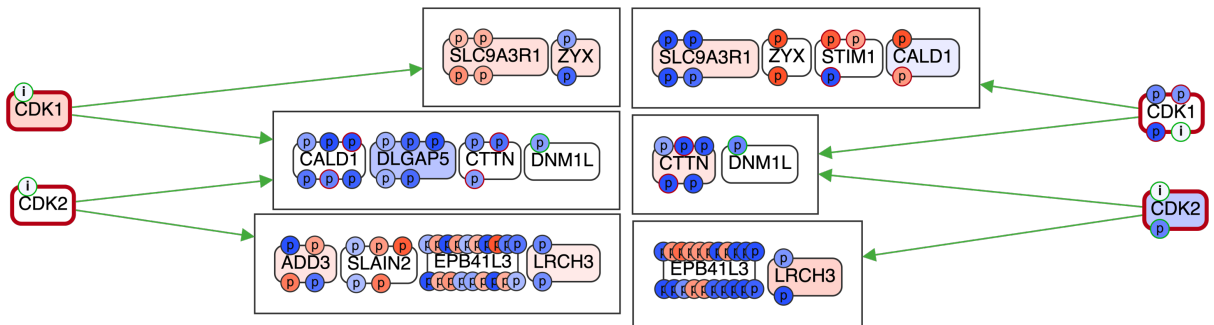

## Chromatin remodeling proteins

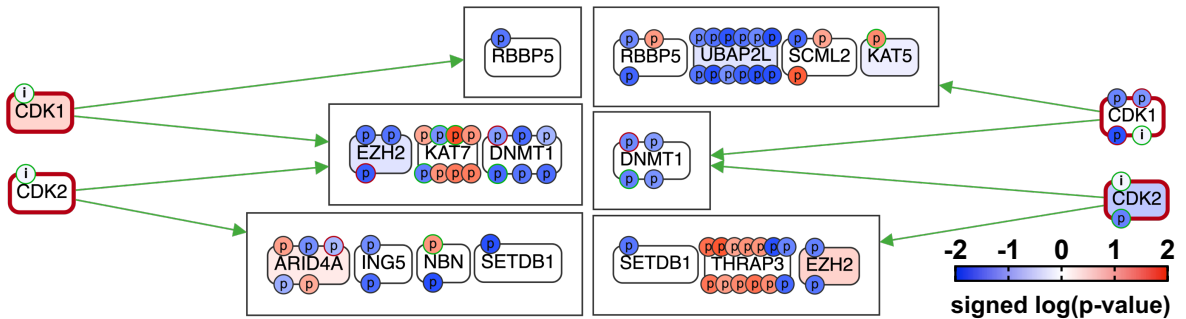

**Figure S5: Combined CausalPath subgraphs for CDK1 and CDK2.** Combined subgraphs for CDK1 and CDK2 were generated in CausalPath for both MP41 and MP46 cell lines in response to FR at FDR  $\leq 0.001$ . Color intensities for phosphorylation are based on adjusted p-values, as determined by CausalPath. Protein levels are color coded based on log<sub>2</sub> fold change with FR (red: increased; blue: decreased). Black boxes indicate co-regulated targets of phosphorylation by CDK1, CDK2, or both kinases as defined by CausalPath for each cell line. Targets of phosphorylation defined by CausalPath were entered into the MSigDB analysis portal and sorted by Pathway. Unsorted targets were then re-sorted by Hallmark and then by GO:BP terms. CausalPath identified significant dephosphorylation of many non-cell cycle targets of CDKs involved in mitogenic signaling, chromatin remodeling, and regulation of the actin cytoskeleton.

S6 = 32 kDa

pS6 100 nM FR Western Blot

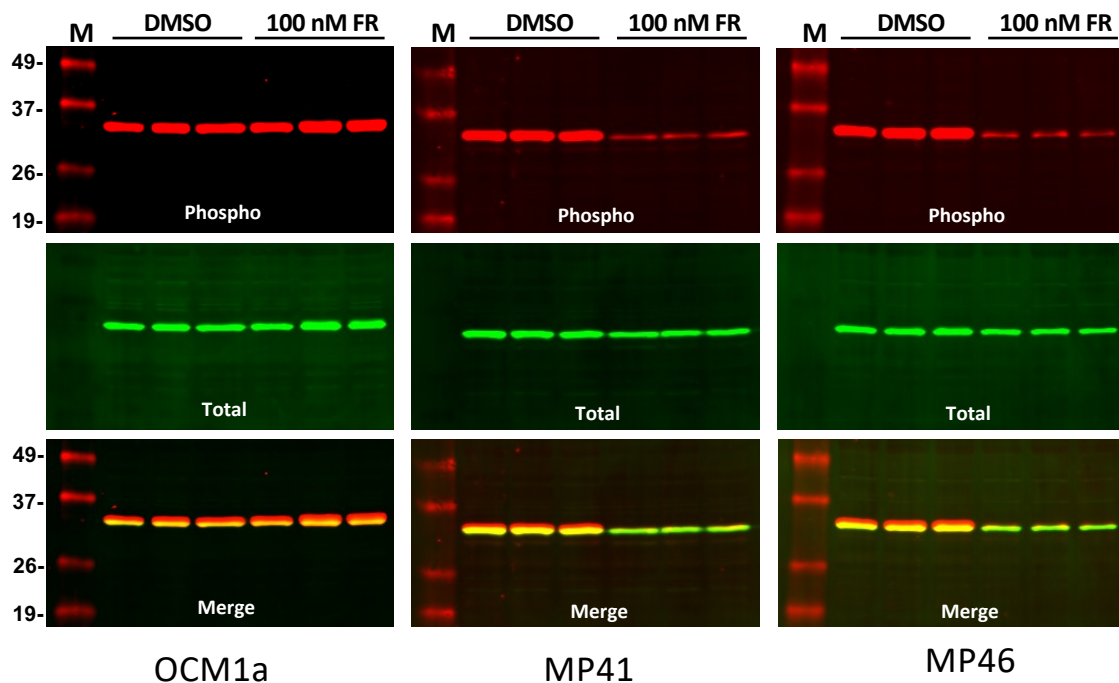

**Figure S6: Fluorescence imaging scans for RPS6 immunoblots.** OCM-1A, MP41, and MP46 cells were treated with 100 nM FR or vehicle (DMSO) for 24 hours in three separate experiments each (biological replicates). Cell lysates were normalized to protein content by Bradford assay and equal amounts were loaded to each of six lanes per gel. Lysates were resolved on 12% SDS-PAGE gels, transferred to PVDF membranes, and incubated with rabbit anti-phospho-S6 ribosomal protein (Ser240/244) and mouse anti-ribosomal protein S6 antibodies. Membranes were imaged using IRDye 680 Goat anti-rabbit and IRDye 800 Goat anti-mouse secondary antibodies on a LI-COR Odyssey imaging system.

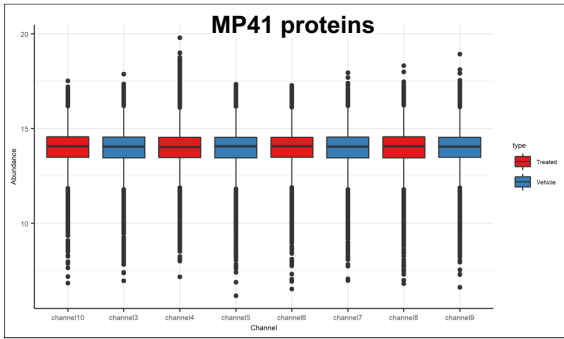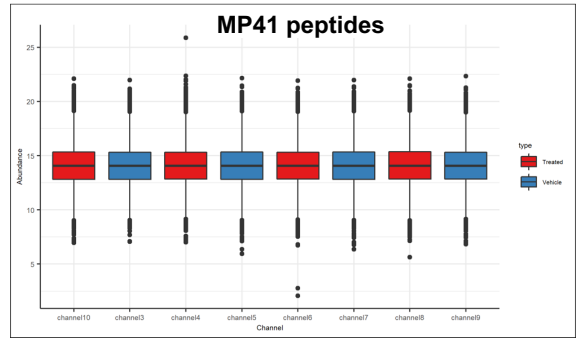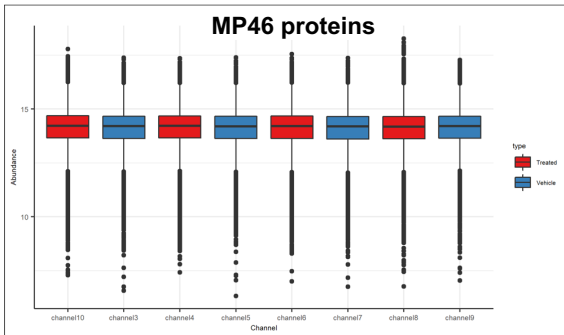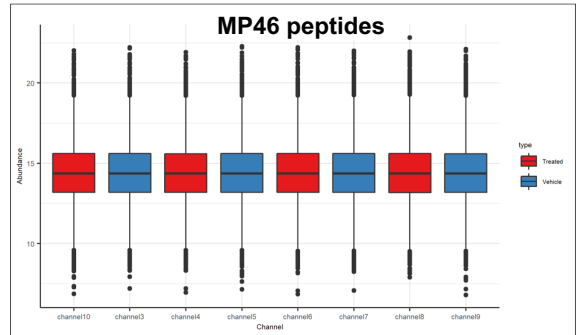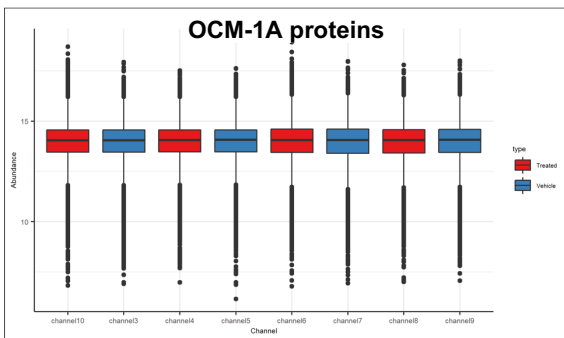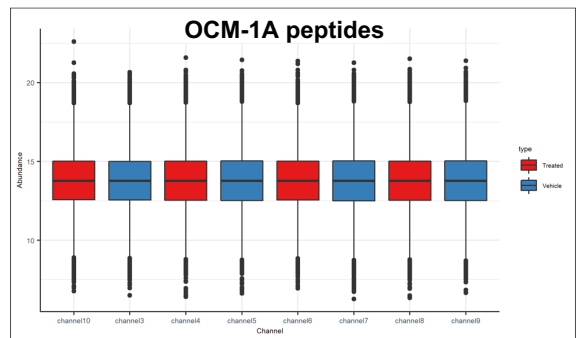

**Figure S7: Boxplots of protein and phosphopeptide abundance.** Summary data from MaxQuant analysis of protein and phosphopeptide abundances for MP41, MP46, and OCM-1A cell lines. Each channel represents a single sample. Boxes are bounded by quartile values for each sample (the box extends from the 25th to 75th percentiles), with the middle black bar at the median value for each sample. Control samples are indicated by blue boxes and FR-treated samples are indicated by red boxes.
